# Supplementary material for: DNA methylation in the inflammatory genes after neurosurgery and diagnostic ability of post-operative delirium
Source: PubMed Central journal article supplement (PMC8660911; doi:10.1038/s41398-021-01752-6), 2021-12-09
Supplement: 41398_2021_1752_MOESM1_ESM.pdf [file 41398_2021_1752_MOESM1_ESM.pdf]

# Supplementary method

## Calculation of Inflammatory methylation Index (IMI)

Score named “Inflammatory Methylation Index (IMI)” was obtained for each subject. First, ROC curves were made and AUCs were calculated based on the DNA methylation levels of each CpG site. We selected several CpG sites with a large AUC as candidates to construct the combined index. Then, we optimized the number and combination of CpG sites to obtain a better ROC curve, and five CpG sites were selected for the IMI. Five CpG sites: one CpG sites from the *TNF* gene (cg08639424), two CpG sites from the *IL1B* gene (cg15836722 and cg23149881), and two CpG sites from the *IL6* gene (cg15703690 and cg17067544) were selected to calculate IMI. We first created an ROC curve for each CpG site to determine the best cutoff value to separate POD from non-POD. For each CpG site, we added 1 point if the post-operative DNAm level met the criteria divided by the cutoff value, 0 points if it did not, and repeated the process for 5 CpGs (**Supplementary Figure 1**). The total score of those points was used as IMI (ranging from 0 to 5). Then, the relationship between IMI and POD was evaluated by a ROC curve. Two examples are shown below. To validate the results, the IMI was calculated using the same CpG sites and the same process with another cohort from our previous study. Then, the relationship between IMI from the previous cohort and delirium was tested.

Furthermore, the same approach was used to calculate the IMI from the pre-operative DNAm (pre-IMI) and amount of change in DNAm level after surgery (diff-IMI). Five different CpG sites were selected to optimize the ROC; cg23384708 (*TNF* gene), cg07250315 (*IL1B* gene), cg18635064 (*IL1B* gene), cg03601896 (*IL6* gene), and cg10140158 (*IL6* gene) for pre-IMI and cg19124225 (*TNF* gene), cg07250315 (*IL1B* gene), cg20157753 (*IL1B* gene), cg07998387 (*IL6* gene), and cg13104385 (*IL6* gene) for diff-IMI.

## Supplementary Figure 1

*TNF* gene: cg08639424

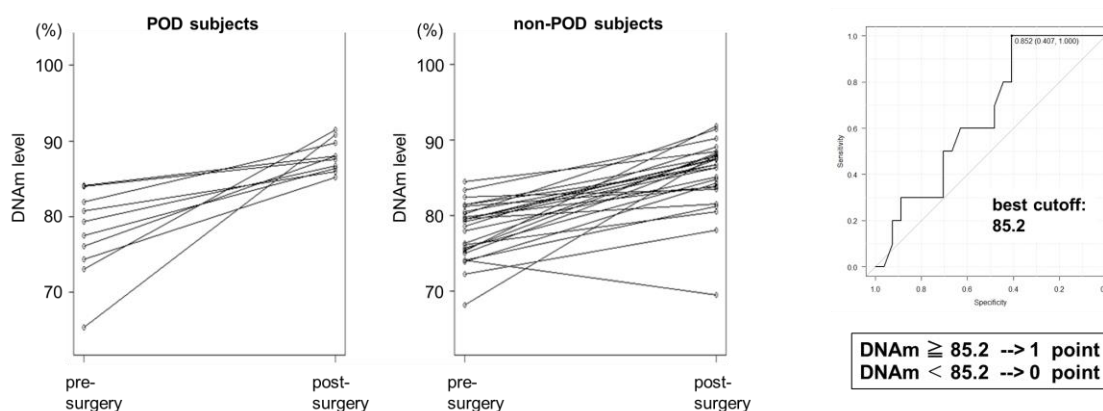

**IL1B gene: cg15836722**

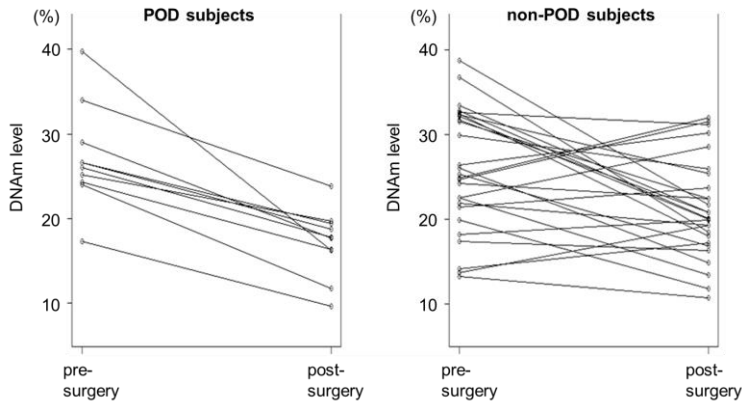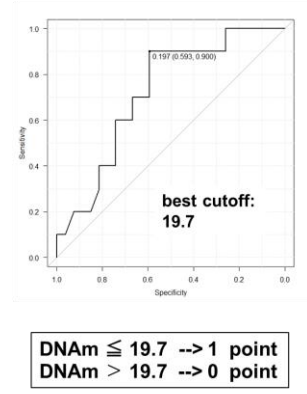

**IL1B gene: cg23149881**

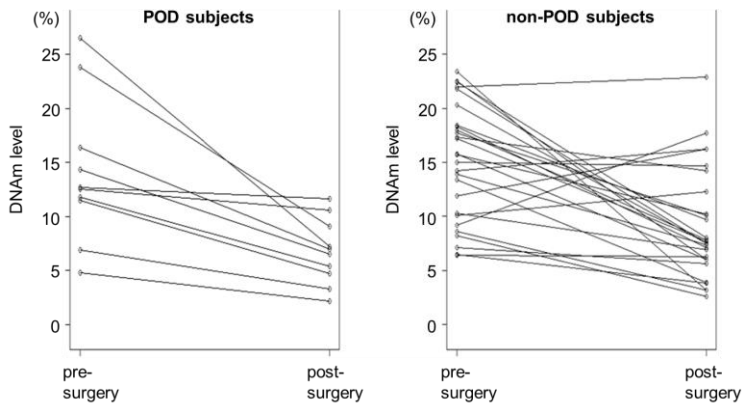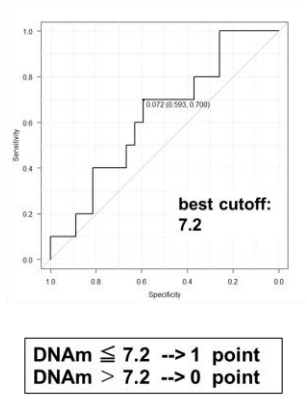

**IL6 gene: cg15703690**

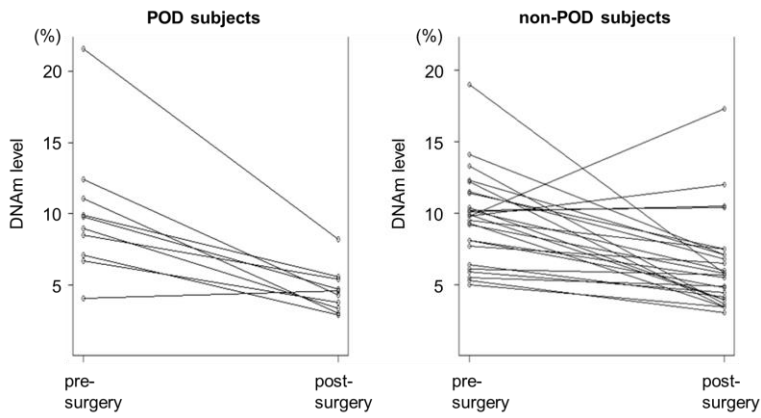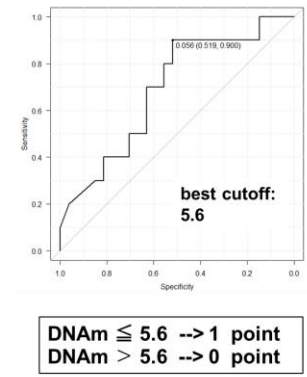

**IL6 gene: cg17067544**

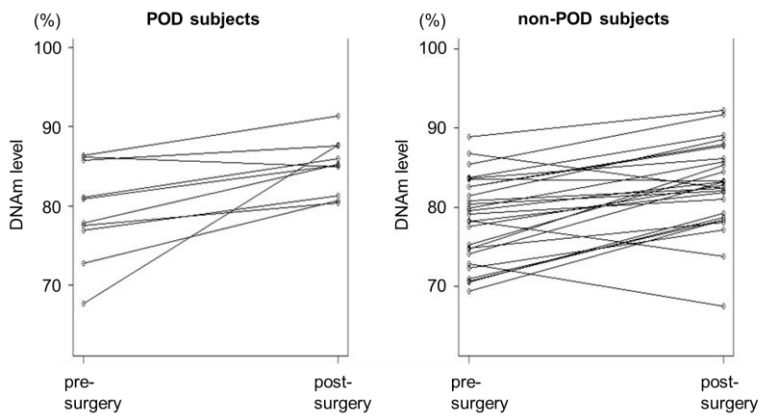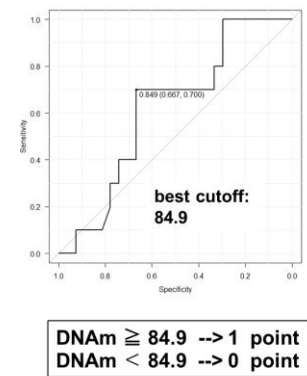

< examples >

|             |            | subject A |       | subject B |       | criteria (1 point) |
|-------------|------------|-----------|-------|-----------|-------|--------------------|
|             |            | DNAm (%)  | point | DNAm (%)  | point |                    |
| <i>TNF</i>  | cg08639424 | 88.3      | 1     | 80.5      | 0     | DNAm >= 85.2       |
| <i>IL1B</i> | cg15836722 | 13.4      | 1     | 31.2      | 0     | DNAm <= 19.7       |
| <i>IL1B</i> | cg23149881 | 2.6       | 1     | 22.9      | 0     | DNAm <= 7.2        |
| <i>IL6</i>  | cg15703690 | 3.4       | 1     | 6.8       | 0     | DNAm <= 5.6        |
| <i>IL6</i>  | cg17067544 | 82.4      | 0     | 85.7      | 1     | DNAm >= 84.9       |
| <b>IMI</b>  |            | <b>4</b>  |       | <b>1</b>  |       |                    |

# Supplementary Tables

**Supplementary Table 1. Patient Characteristics**

| Classification             | All Subjects | EPIC analysis |         | p     | Statistical test | pyrosequencing |         | p     | Statistical test |
|----------------------------|--------------|---------------|---------|-------|------------------|----------------|---------|-------|------------------|
|                            |              | POD           | non-POD |       |                  | POD            | non-POD |       |                  |
| N                          | 39           | 10            | 27      |       |                  | 7              | 20      |       |                  |
| Mean age — yr              | 33.4         | 41.0          | 29.8    | 0.046 | t = -2.07        | 44.9           | 29.5    | 0.01  | t = -2.71        |
| SD                         | 15.1         | 15.6          | 14.3    |       |                  | 15.1           | 2.1     |       |                  |
| Female sex (n)             | 15           | 5             | 8       | 0.44  | $\chi^2 = 0.59$  | 4              | 7       | 0.56  | $\chi^2 = 0.34$  |
| %                          | 38.5         | 50.0          | 29.6    |       |                  | 57.1           | 35.0    |       |                  |
| Race, White (n)            | 36           | 10            | 26      | >0.99 | $\chi^2 < 0.01$  | 7              | 19      | >0.99 | $\chi^2 < 0.01$  |
| %                          | 97.3         | 100.0         | 96.3    |       |                  | 100.0          | 95.0    |       |                  |
| alcohol (n)                | 12           | 3             | 9       | >0.99 | $\chi^2 < 0.01$  | 3              | 8       | >0.99 | $\chi^2 < 0.01$  |
| %                          | 30.8         | 30.0          | 33.3    |       |                  | 42.9           | 40.0    |       |                  |
| tobacco (n)                | 16           | 5             | 10      | 0.74  | $\chi^2 = 0.11$  | 4              | 10      | >0.99 | $\chi^2 < 0.01$  |
| %                          | 41.0         | 50.0          | 37.0    |       |                  | 57.1           | 50.0    |       |                  |
| Mean ASA-PS                | 2.4          | 2.2           | 2.5     | 0.13  | t = 1.56         | 2.1            | 2.5     | 0.16  | t = 1.45         |
| SD                         | 0.5          | 0.4           | 0.5     |       |                  | 0.4            | 0.5     |       |                  |
| Mean BMI                   | 29.8         | 29.7          | 29.5    | 0.96  | t = -0.06        | 32.2           | 27.2    | 0.18  | t = -1.38        |
| SD                         | 10.4         | 8.6           | 11.1    |       |                  | 8.6            | 8.3     |       |                  |
| Mean anesthesia time (min) | 530.6        | 533.8         | 536.7   | 0.93  | t = 0.09         | 535.1          | 525.0   | 0.82  | t = -0.23        |
| SD                         | 91.0         | 88.4          | 90.0    |       |                  | 85.5           | 104.0   |       |                  |
| mean procedure time (min)  | 348.1        | 355.3         | 353.0   | 0.95  | t = -0.07        | 343.1          | 339.5   | 0.93  | t = -0.09        |
| SD                         | 90.1         | 95.4          | 87.0    |       |                  | 81.1           | 96.2    |       |                  |
| Mean blood loss (ml)       | 165.0        | 145.0         | 178.3   | 0.46  | t = 0.74         | 160.7          | 186.5   | 0.69  | t = 0.41         |
| SD                         | 120.0        | 165.3         | 102.1   |       |                  | 199.9          | 121.2   |       |                  |

Abbreviation: POD; post operative delirium, SD; Standard deviation, ASA: the American Society of Anesthesiologists (ASA) physical status, BMI; Body mass index

**Supplementary Table 2. Cell type proportions**

| cell type                | pre-surgery |         |      | post-surgery     |         |     | amount of change (post-pre) |                  |       |      |      |                  |
|--------------------------|-------------|---------|------|------------------|---------|-----|-----------------------------|------------------|-------|------|------|------------------|
|                          | POD         | non-POD |      | POD              | non-POD |     | POD                         | non-POD          |       |      |      |                  |
| N                        | 10          | 27      | p    | Statistical test | 10      | 27  | p                           | Statistical test | 10    | 27   | p    | Statistical test |
| CD8 T cells (%)          | 6.8         | 8.6     | 0.27 | t = 1.12         | 1.6     | 3.3 | 0.26                        | t = 1.16         | -5.2  | -5.3 | 0.95 | t = -0.06        |
| SD                       | 3.1         | 4.6     |      |                  | 1.6     | 4.4 |                             |                  | 3.4   | 4.5  |      |                  |
| CD4-T cells (%)          | 12.3        | 11.7    | 0.79 | t = -0.27        | 0.9     | 4.0 | 0.13                        | t = 1.55         | -11.4 | -7.7 | 0.21 | t = 1.28         |
| SD                       | 4.6         | 6.4     |      |                  | 0.8     | 6.2 |                             |                  | 4.7   | 8.7  |      |                  |
| natural killer cells (%) | 0.9         | 1.3     | 0.57 | t = 0.57         | 1.1     | 1.5 | 0.64                        | t = 0.47         | 0.2   | 0.2  | 0.97 | t = -0.04        |
| SD                       | 1.5         | 2.1     |      |                  | 1.9     | 2.2 |                             |                  | 2.5   | 3.0  |      |                  |
| B cells (%)              | 4.0         | 2.9     | 0.31 | t = -1.03        | 0.9     | 1.6 | 0.30                        | t = 1.05         | -3.2  | -1.4 | 0.11 | t = 1.65         |
| SD                       | 3.3         | 2.7     |      |                  | 1.1     | 2.0 |                             |                  | 3.2   | 2.8  |      |                  |
| Monocytes (%)            | 7.3         | 7.5     | 0.84 | t = 0.20         | 3.0     | 3.6 | 0.50                        | t = 0.68         | -4.3  | -3.9 | 0.70 | t = 0.39         |
| SD                       | 3.2         | 2.9     |      |                  | 1.7     | 2.6 |                             |                  | 3.0   | 2.7  |      |                  |

Abbreviation: POD; post operative delirium, SD; Standard deviation

**Supplementary Table 3. Pre-surgery DNAm in the *TNF* gene**

| cg         | location       | EPIC                |                         |      |                   |                     | pyrosequencing     |                         |      |                   |                     |
|------------|----------------|---------------------|-------------------------|------|-------------------|---------------------|--------------------|-------------------------|------|-------------------|---------------------|
|            |                | POD<br>N=10<br>mean | non-POD<br>N=27<br>mean | diff | t-test<br>p-value | adjusted<br>p-value | POD<br>N=7<br>mean | non-POD<br>N=20<br>mean | diff | t-test<br>p-value | adjusted<br>p-value |
|            | chr6: 31542460 |                     |                         |      |                   |                     | 72.7               | 74.5                    | -1.7 | 0.30              | 0.98                |
| cg08639424 | chr6: 31542556 | 77.7                | 78.0                    | 0.3  | 0.85              | 0.90                |                    |                         |      |                   |                     |
| cg19978379 | chr6: 31542671 | 73.0                | 71.3                    | -1.7 | 0.37              | 0.24                |                    |                         |      |                   |                     |
| cg24452282 | chr6: 31542741 | 73.8                | 73.3                    | -0.5 | 0.83              | 0.79                |                    |                         |      |                   |                     |
|            | chr6: 31543170 |                     |                         |      |                   |                     | 6.5                | 7.2                     | -0.7 | 0.59              | 0.49                |
|            | chr6: 31543176 |                     |                         |      |                   |                     | 8.0                | 9.2                     | -1.2 | 0.44              | 0.70                |
|            | chr6: 31543178 |                     |                         |      |                   |                     | 2.0                | 3.8                     | -1.8 | 0.08              | 0.56                |
|            | chr6: 31543193 |                     |                         |      |                   |                     | 4.6                | 5.5                     | -0.9 | 0.47              | 0.53                |
| cg21370522 | chr6: 31543219 | 13.6                | 13.0                    | -0.6 | 0.75              | 0.73                | 3.8                | 4.4                     | -0.5 | 0.50              | 0.53                |
| cg19648923 | chr6: 31543266 | 10.3                | 10.6                    | 0.3  | 0.84              | 0.47                | 2.7                | 3.0                     | -0.4 | 0.56              | 0.71                |
| cg01569083 | chr6: 31543290 | 19.0                | 18.8                    | -0.2 | 0.94              | 0.47                | 2.9                | 3.5                     | -0.6 | 0.38              | 0.62                |
| cg03037030 | chr6: 31543300 | 5.6                 | 6.6                     | 1.0  | 0.38              | 0.92                | 8.5                | 9.1                     | -0.7 | 0.61              | 0.61                |
|            | chr6: 31543430 |                     |                         |      |                   |                     | 1.5                | 2.1                     | -0.6 | 0.15              | 0.70                |
|            | chr6: 31543487 |                     |                         |      |                   |                     | 5.3                | 6.6                     | -1.3 | 0.20              | 0.81                |
| cg12681001 | chr6: 31543541 | 8.8                 | 9.1                     | 0.4  | 0.79              | 0.39                | 9.1                | 10.9                    | -1.8 | 0.20              | 0.67                |
| cg21222743 | chr6: 31543546 | 5.8                 | 6.9                     | 1.1  | 0.39              | 0.49                | 7.7                | 9.2                     | -1.5 | 0.22              | 0.80                |
| cg10717214 | chr6: 31543558 | 8.3                 | 9.7                     | 1.4  | 0.33              | 0.46                | 33.6               | 33.5                    | 0.1  | 0.96              | 0.83                |
| cg04425624 | chr6: 31543566 | 17.2                | 17.5                    | 0.3  | 0.92              | 0.30                | 20.8               | 21.3                    | -0.5 | 0.86              | 0.44                |
| cg21467614 | chr6: 31543638 | 17.1                | 17.9                    | 0.8  | 0.66              | 0.18                |                    |                         |      |                   |                     |
| cg08553327 | chr6: 31543647 | 15.4                | 16.9                    | 1.6  | 0.53              | 0.31                |                    |                         |      |                   |                     |
| cg26729380 | chr6: 31543655 | 10.6                | 11.9                    | 1.3  | 0.49              | 0.14                |                    |                         |      |                   |                     |
| cg10650821 | chr6: 31543686 | 11.4                | 11.7                    | 0.3  | 0.86              | 0.58                |                    |                         |      |                   |                     |
|            | chr6: 31544695 |                     |                         |      |                   |                     | 63.2               | 66.1                    | -2.9 | 0.59              | 0.60                |
|            | chr6: 31544752 |                     |                         |      |                   |                     | 78.2               | 76.8                    | 1.4  | 0.70              | 0.46                |
|            | chr6: 31544800 |                     |                         |      |                   |                     | 24.0               | 22.3                    | 1.8  | 0.26              | 0.17                |
|            | chr6: 31544822 |                     |                         |      |                   |                     | 58.1               | 56.0                    | 2.1  | 0.40              | 0.30                |
|            | chr6: 31544848 |                     |                         |      |                   |                     | 14.6               | 12.8                    | 1.7  | 0.09              | <u>0.01</u>         |
| cg01360627 | chr6: 31544931 | 69.8                | 70.0                    | 0.2  | 0.93              | 0.97                | 27.4               | 25.3                    | 2.1  | 0.23              | 0.10                |
| cg23384708 | chr6: 31544934 | 67.4                | 63.0                    | -4.4 | <u>0.04</u>       | 0.77                | 77.3               | 72.8                    | 4.5  | 0.16              | 0.11                |
| cg20477259 | chr6: 31544960 | 62.5                | 61.3                    | -1.2 | 0.61              | 0.78                | 68.9               | 67.5                    | 1.4  | 0.63              | 0.65                |
|            | chr6: 31545253 |                     |                         |      |                   |                     | 87.9               | 88.2                    | -0.3 | 0.88              | 0.91                |
|            | chr6: 31545258 |                     |                         |      |                   |                     | 88.7               | 87.4                    | 1.3  | 0.52              | 0.31                |
|            | chr6: 31545267 |                     |                         |      |                   |                     | 84.1               | 81.3                    | 2.8  | 0.29              | 0.14                |
| cg15989608 | chr6: 31545322 | 72.2                | 70.9                    | -1.3 | 0.54              | 0.35                | 92.1               | 89.8                    | 2.3  | 0.21              | 0.12                |
| cg26736341 | chr6: 31545343 | 71.4                | 69.5                    | -1.8 | 0.43              | 0.35                | 78.0               | 79.2                    | -1.1 | 0.65              | 0.21                |
|            | chr6: 31545432 |                     |                         |      |                   |                     | 89.9               | 85.9                    | 3.9  | 0.11              | 0.09                |
| cg04472685 | chr6: 31545474 | 82.0                | 81.2                    | -0.7 | 0.66              | 0.56                | 83.4               | 84.2                    | -0.8 | 0.68              | 0.77                |
| cg19124225 | chr6: 31545836 | 94.8                | 95.9                    | 1.1  | 0.10              | 0.45                |                    |                         |      |                   |                     |
| cg02137984 | chr6: 31545899 | 93.7                | 95.1                    | 1.4  | 0.10              | 0.27                |                    |                         |      |                   |                     |
| cg06825478 | chr6: 31546068 | 91.0                | 89.9                    | -1.2 | 0.47              | 0.28                | 91.8               | 91.8                    | 0.1  | 0.93              | 0.64                |
|            | chr6: 31546086 |                     |                         |      |                   |                     | 85.2               | 85.1                    | 0.1  | 0.96              | 0.97                |

Notes:

underline nominal significance (P < 0.05)

adjusted p-value (EPIC analysis); multiple regression analysis results corrected by age, sex, and cell proportion.

adjusted p-value (pyrosequencing); multiple regression analysis results corrected by age and sex.

**Supplementary Table 4. Pre-surgery DNAm in the *IL1B* and *IL6* gene**

| cg                 | POD non-POD  |              | diff | t-test<br>p-value | adjusted<br>p-value |
|--------------------|--------------|--------------|------|-------------------|---------------------|
|                    | N=10<br>mean | N=27<br>mean |      |                   |                     |
| <b><i>IL1B</i></b> |              |              |      |                   |                     |
| cg01290568         | 26.2         | 26.5         | 0.3  | 0.92              | 0.59                |
| cg02596281         | 84.4         | 84.2         | -0.2 | 0.93              | 0.78                |
| cg07250315         | 39.9         | 36.9         | -3.0 | 0.16              | 0.02                |
| cg07935264         | 8.8          | 9.2          | 0.4  | 0.70              | 0.78                |
| cg10486274         | 93.9         | 93.6         | -0.3 | 0.65              | 0.64                |
| cg14117934         | 86.7         | 86.1         | -0.6 | 0.73              | 0.30                |
| cg15218327         | 92.4         | 92.0         | -0.4 | 0.69              | 0.36                |
| cg15836722         | 27.3         | 26.0         | -1.3 | 0.61              | 0.28                |
| cg18635064         | 93.2         | 95.1         | 1.9  | 0.14              | 0.10                |
| cg18773937         | 6.8          | 7.3          | 0.6  | 0.65              | 0.57                |
| cg19890119         | 15.9         | 15.5         | -0.5 | 0.83              | 0.97                |
| cg20157753         | 5.9          | 5.2          | -0.7 | 0.19              | 0.17                |
| cg20983042         | 87.5         | 86.9         | -0.6 | 0.77              | 0.85                |
| cg23149881         | 14.1         | 15.0         | 0.9  | 0.67              | 0.52                |
| <b><i>IL6</i></b>  |              |              |      |                   |                     |
| cg00087425         | 6.3          | 6.5          | 0.2  | 0.72              | 0.96                |
| cg00175482         | 88.6         | 89.1         | 0.6  | 0.62              | 0.78                |
| cg01770232         | 7.7          | 6.9          | -0.8 | 0.44              | 0.98                |
| cg02335517         | 93.3         | 93.4         | 0.2  | 0.87              | 0.46                |
| cg03601896         | 4.0          | 3.7          | -0.4 | 0.57              | > 0.99              |
| cg05265849         | 21.4         | 19.7         | -1.7 | 0.56              | 0.62                |
| cg07998387         | 69.8         | 69.4         | -0.5 | 0.80              | 0.79                |
| cg10140158         | 86.8         | 88.0         | 1.2  | 0.34              | 0.37                |
| cg13104385         | 41.1         | 39.5         | -1.6 | 0.67              | 0.66                |
| cg15703690         | 10.0         | 9.5          | -0.5 | 0.69              | 0.42                |
| cg17067544         | 79.3         | 78.5         | -0.8 | 0.69              | 0.53                |
| cg20509117         | 62.2         | 62.3         | 0.1  | 0.98              | 0.83                |
| cg21785978         | 5.2          | 5.5          | 0.3  | 0.68              | 0.84                |
| cg23731304         | 38.7         | 37.2         | -1.6 | 0.48              | 0.11                |

Notes:  
adjusted p-value; multiple regression analysis results corrected by age, sex, and cell proportion.

**Supplementary Table 5. Correlations between age and pre-surgery DNAm in the *IL1B* and *IL6* gene**

| cg                 | all<br>N=37 |             | POD<br>N=10 |             | non-POD<br>N=27 |             |
|--------------------|-------------|-------------|-------------|-------------|-----------------|-------------|
|                    | r           | p           | r           | p           | r               | p           |
| <b><i>IL1B</i></b> |             |             |             |             |                 |             |
| cg01290568         | -0.16       | 0.35        | -0.08       | 0.84        | -0.19           | 0.35        |
| cg02596281         | -0.11       | 0.53        | -0.12       | 0.74        | -0.12           | 0.56        |
| cg07250315         | -0.02       | 0.91        | 0.05        | 0.89        | -0.16           | 0.43        |
| cg07935264         | -0.25       | 0.14        | -0.33       | 0.35        | -0.19           | 0.34        |
| cg10486274         | -0.05       | 0.75        | -0.29       | 0.42        | 0.01            | 0.96        |
| cg14117934         | -0.22       | 0.20        | 0.48        | 0.16        | -0.40           | <u>0.04</u> |
| cg15218327         | -0.27       | 0.10        | -0.75       | <u>0.01</u> | -0.21           | 0.30        |
| cg15836722         | -0.14       | 0.42        | -0.16       | 0.65        | -0.18           | 0.36        |
| cg18635064         | -0.11       | 0.53        | -0.17       | 0.65        | 0.05            | 0.79        |
| cg18773937         | -0.22       | 0.20        | 0.34        | 0.34        | -0.42           | <u>0.03</u> |
| cg19890119         | 0.06        | 0.73        | 0.14        | 0.71        | 0.02            | 0.93        |
| cg20157753         | 0.00        | 0.98        | -0.40       | 0.26        | 0.04            | 0.86        |
| cg20983042         | -0.13       | 0.45        | -0.17       | 0.64        | -0.15           | 0.46        |
| cg23149881         | -0.25       | 0.13        | -0.22       | 0.53        | -0.25           | 0.21        |
| <b><i>IL6</i></b>  |             |             |             |             |                 |             |
| cg00087425         | -0.02       | 0.90        | -0.18       | 0.62        | 0.05            | 0.81        |
| cg00175482         | -0.24       | 0.16        | -0.33       | 0.35        | -0.16           | 0.42        |
| cg01770232         | 0.14        | 0.39        | 0.48        | 0.16        | -0.17           | 0.41        |
| cg02335517         | 0.08        | 0.64        | 0.50        | 0.14        | 0.01            | 0.95        |
| cg03601896         | 0.29        | 0.08        | 0.49        | 0.15        | 0.18            | 0.37        |
| cg05265849         | 0.14        | 0.39        | 0.16        | 0.65        | 0.10            | 0.63        |
| cg07998387         | -0.06       | 0.73        | 0.24        | 0.50        | -0.18           | 0.38        |
| cg10140158         | -0.20       | 0.25        | -0.26       | 0.46        | -0.11           | 0.59        |
| cg13104385         | 0.04        | 0.84        | 0.13        | 0.73        | -0.04           | 0.85        |
| cg15703690         | 0.38        | <u>0.02</u> | 0.55        | 0.10        | 0.29            | 0.14        |
| cg17067544         | -0.24       | 0.15        | -0.24       | 0.50        | -0.30           | 0.14        |
| cg20509117         | 0.14        | 0.41        | 0.47        | 0.17        | 0.07            | 0.75        |
| cg21785978         | -0.38       | <u>0.02</u> | -0.11       | 0.77        | -0.49           | <u>0.01</u> |
| cg23731304         | -0.33       | <u>0.04</u> | -0.32       | 0.37        | -0.43           | <u>0.03</u> |

Notes:  
underline nominal significance (P < 0.05)



Supplementary Table 6. Post-surgery DNAm in the *TNF* gene

| cg         | location       | EPIC                |                         |      |                   |                     | pyrosequencing     |                         |      |                   |                     |
|------------|----------------|---------------------|-------------------------|------|-------------------|---------------------|--------------------|-------------------------|------|-------------------|---------------------|
|            |                | POD<br>N=10<br>mean | non-POD<br>N=27<br>mean | diff | t-test<br>p-value | adjusted<br>p-value | POD<br>N=7<br>mean | non-POD<br>N=20<br>mean | diff | t-test<br>p-value | adjusted<br>p-value |
|            | chr6: 31542460 |                     |                         |      |                   |                     | 78.1               | 78.1                    | 0.0  | 0.99              | 0.84                |
| cg08639424 | chr6: 31542556 | 88.0                | 85.5                    | 2.5  | 0.11              | 0.28                |                    |                         |      |                   |                     |
| cg19978379 | chr6: 31542671 | 81.9                | 80.6                    | 1.3  | 0.55              | 0.11                |                    |                         |      |                   |                     |
| cg24452282 | chr6: 31542741 | 86.9                | 83.6                    | 3.3  | 0.23              | 0.53                |                    |                         |      |                   |                     |
|            | chr6: 31543170 |                     |                         |      |                   |                     | 6.4                | 5.4                     | 1.0  | 0.30              | <u>0.03</u>         |
|            | chr6: 31543176 |                     |                         |      |                   |                     | 7.5                | 7.6                     | -0.1 | 0.90              | 0.27                |
|            | chr6: 31543178 |                     |                         |      |                   |                     | 2.3                | 2.7                     | -0.4 | 0.50              | 0.84                |
|            | chr6: 31543193 |                     |                         |      |                   |                     | 3.5                | 4.1                     | -0.6 | 0.45              | 0.62                |
| cg21370522 | chr6: 31543219 | 14.4                | 13.9                    | 0.5  | 0.84              | 0.60                | 3.6                | 3.4                     | 0.2  | 0.63              | 0.11                |
| cg19648923 | chr6: 31543266 | 7.8                 | 8.2                     | -0.4 | 0.76              | 0.59                | 2.4                | 2.3                     | 0.1  | 0.82              | 0.32                |
| cg01569083 | chr6: 31543290 | 16.8                | 17.7                    | -0.9 | 0.65              | 0.98                | 2.5                | 2.7                     | -0.2 | 0.61              | 0.46                |
| cg03037030 | chr6: 31543300 | 4.5                 | 5.0                     | -0.5 | 0.59              | 0.77                | 7.6                | 7.8                     | -0.3 | 0.74              | 0.65                |
|            | chr6: 31543430 |                     |                         |      |                   |                     | 1.9                | 2.0                     | -0.1 | 0.80              | 0.34                |
|            | chr6: 31543487 |                     |                         |      |                   |                     | 4.9                | 5.4                     | -0.5 | 0.64              | 0.61                |
| cg12681001 | chr6: 31543541 | 6.7                 | 7.5                     | -0.7 | 0.30              | 0.93                | 9.5                | 9.0                     | 0.5  | 0.75              | 0.50                |
| cg21222743 | chr6: 31543546 | 3.4                 | 4.2                     | -0.9 | 0.26              | <u>0.01</u>         | 7.1                | 7.4                     | -0.3 | 0.74              | 0.60                |
| cg10717214 | chr6: 31543558 | 6.0                 | 6.5                     | -0.5 | 0.62              | <u>0.02</u>         | 35.0               | 32.0                    | 3.1  | 0.35              | 0.90                |
| cg04425624 | chr6: 31543566 | 12.0                | 13.5                    | -1.5 | 0.42              | 0.64                | 21.6               | 20.5                    | 1.1  | 0.70              | 0.86                |
| cg21467614 | chr6: 31543638 | 14.1                | 15.0                    | -0.9 | 0.47              | 0.23                |                    |                         |      |                   |                     |
| cg08553327 | chr6: 31543647 | 11.6                | 13.7                    | -2.1 | 0.24              | 0.65                |                    |                         |      |                   |                     |
| cg26729380 | chr6: 31543655 | 6.4                 | 8.4                     | -2.1 | 0.13              | 0.44                |                    |                         |      |                   |                     |
| cg10650821 | chr6: 31543686 | 10.0                | 10.2                    | -0.2 | 0.86              | 0.63                |                    |                         |      |                   |                     |
|            | chr6: 31544695 |                     |                         |      |                   |                     | 69.4               | 73.5                    | -4.0 | 0.50              | 0.43                |
|            | chr6: 31544752 |                     |                         |      |                   |                     | 86.2               | 85.9                    | 0.3  | 0.92              | 0.96                |
|            | chr6: 31544800 |                     |                         |      |                   |                     | 26.3               | 23.8                    | 2.5  | 0.08              | 0.21                |
|            | chr6: 31544822 |                     |                         |      |                   |                     | 62.5               | 62.1                    | 0.4  | 0.88              | 0.75                |
|            | chr6: 31544848 |                     |                         |      |                   |                     | 14.0               | 13.0                    | 1.0  | 0.14              | 0.06                |
| cg01360627 | chr6: 31544931 | 80.2                | 78.1                    | 2.1  | 0.37              | 0.69                | 28.9               | 26.7                    | 2.2  | 0.22              | 0.34                |
| cg23384708 | chr6: 31544934 | 74.0                | 71.6                    | 2.4  | 0.32              | 0.47                | 83.9               | 82.0                    | 1.8  | 0.56              | 0.90                |
| cg20477259 | chr6: 31544960 | 73.4                | 71.3                    | 2.1  | 0.44              | 0.42                | 76.4               | 74.1                    | 2.4  | 0.37              | 0.74                |
|            | chr6: 31545253 |                     |                         |      |                   |                     | 92.3               | 91.8                    | 0.5  | 0.78              | 0.93                |
|            | chr6: 31545258 |                     |                         |      |                   |                     | 92.2               | 91.3                    | 0.9  | 0.73              | 0.72                |
|            | chr6: 31545267 |                     |                         |      |                   |                     | 87.8               | 87.8                    | 0.0  | >0.99             | 0.68                |
| cg15989608 | chr6: 31545322 | 80.8                | 79.1                    | 1.7  | 0.43              | 0.49                | 91.9               | 94.2                    | -2.3 | 0.10              | <u>0.03</u>         |
| cg26736341 | chr6: 31545343 | 80.6                | 79.0                    | 1.7  | 0.48              | 0.61                | 82.4               | 80.4                    | 2.0  | 0.37              | 0.39                |
|            | chr6: 31545432 |                     |                         |      |                   |                     | 91.4               | 89.1                    | 2.2  | 0.57              | 0.66                |
| cg04472685 | chr6: 31545474 | 87.9                | 87.4                    | 0.5  | 0.73              | 0.14                | 87.1               | 86.7                    | 0.4  | 0.82              | 0.62                |
| cg19124225 | chr6: 31545836 | 96.5                | 96.1                    | 0.3  | 0.50              | 0.98                |                    |                         |      |                   |                     |
| cg02137984 | chr6: 31545899 | 96.8                | 96.5                    | 0.2  | 0.69              | 0.28                |                    |                         |      |                   |                     |
| cg06825478 | chr6: 31546068 | 94.7                | 94.1                    | 0.6  | 0.59              | 0.77                | 94.5               | 94.2                    | 0.3  | 0.70              | 0.70                |
|            | chr6: 31546086 |                     |                         |      |                   |                     | 89.4               | 89.3                    | 0.1  | 0.91              | 0.73                |

Notes:

underline nominal significance (P < 0.05)

adjusted p-value (EPIC analysis); multiple regression analysis results corrected by age, sex, and cell proportion.

adjusted p-value (pyrosequencing); multiple regression analysis results corrected by age and sex.

**Supplementary Table 7. Post-surgery DNAm in the *IL1B* and *IL6* gene**

| cg                 | POD  | non-POD | diff | t-test      | adjusted    |
|--------------------|------|---------|------|-------------|-------------|
|                    | N=10 | N=27    |      | p-value     | p-value     |
|                    | mean | mean    |      |             |             |
| <b><i>IL1B</i></b> |      |         |      |             |             |
| cg01290568         | 12.7 | 17.3    | -4.6 | 0.09        | 0.58        |
| cg02596281         | 81.8 | 82.9    | -1.1 | 0.47        | 0.82        |
| cg07250315         | 33.0 | 33.3    | -0.3 | 0.88        | 0.17        |
| cg07935264         | 5.5  | 6.8     | -1.2 | 0.20        | 0.73        |
| cg10486274         | 93.1 | 93.1    | 0.1  | 0.91        | 0.71        |
| cg14117934         | 85.8 | 85.4    | 0.3  | 0.76        | 0.87        |
| cg15218327         | 89.6 | 88.2    | 1.4  | 0.18        | <u>0.02</u> |
| cg15836722         | 17.1 | 21.2    | -4.1 | 0.05        | 0.12        |
| cg18635064         | 92.4 | 95.0    | -2.6 | <u>0.04</u> | 0.05        |
| cg18773937         | 4.2  | 5.1     | -0.9 | 0.27        | 0.91        |
| cg19890119         | 6.7  | 9.6     | -2.9 | 0.16        | 0.69        |
| cg20157753         | 4.2  | 5.0     | -0.8 | 0.13        | 0.61        |
| cg20983042         | 86.8 | 87.1    | -0.3 | 0.80        | 0.74        |
| cg23149881         | 6.8  | 9.1     | -2.3 | 0.19        | 0.69        |
| <b><i>IL6</i></b>  |      |         |      |             |             |
| cg00087425         | 6.2  | 6.8     | -0.6 | 0.40        | 0.58        |
| cg00175482         | 85.7 | 87.3    | -1.6 | 0.22        | 0.48        |
| cg01770232         | 7.7  | 7.5     | 0.2  | 0.77        | 0.50        |
| cg02335517         | 93.0 | 92.5    | 0.4  | 0.63        | 0.88        |
| cg03601896         | 2.7  | 3.1     | -0.4 | 0.41        | 0.60        |
| cg05265849         | 16.9 | 17.9    | -1.0 | 0.72        | 0.68        |
| cg07998387         | 68.6 | 70.7    | -2.2 | 0.29        | 0.50        |
| cg10140158         | 87.0 | 88.2    | -1.2 | 0.20        | 0.38        |
| cg13104385         | 38.4 | 39.4    | -0.9 | 0.81        | 0.63        |
| cg15703690         | 4.6  | 6.2     | -1.7 | 0.13        | 0.31        |
| cg17067544         | 85.0 | 82.7    | 2.3  | 0.22        | 0.59        |
| cg20509117         | 62.5 | 61.6    | 0.8  | 0.78        | 0.96        |
| cg21785978         | 4.4  | 5.3     | -0.9 | 0.15        | 0.08        |
| cg23731304         | 33.5 | 34.9    | -1.4 | 0.49        | 0.98        |

Notes:

underline nominal significance (P < 0.05)

adjusted p-value; multiple regression analysis results corrected by age, sex, and cell proportion.

**Supplementary Table 8. Correlations between age and post-surgery DNAm in the *IL1B* and *IL6* gene**

| cg                 | all<br>N=37 |             | POD<br>N=10 |      | non-POD<br>N=27 |              |
|--------------------|-------------|-------------|-------------|------|-----------------|--------------|
|                    | r           | p           | r           | p    | r               | p            |
| <b><i>IL1B</i></b> |             |             |             |      |                 |              |
| cg01290568         | -0.08       | 0.65        | -0.21       | 0.57 | 0.04            | 0.83         |
| cg02596281         | -0.09       | 0.58        | 0.06        | 0.86 | -0.11           | 0.58         |
| cg07250315         | -0.09       | 0.61        | -0.03       | 0.94 | -0.10           | 0.63         |
| cg07935264         | -0.06       | 0.72        | -0.53       | 0.11 | 0.16            | 0.44         |
| cg10486274         | -0.14       | 0.42        | 0.02        | 0.96 | -0.19           | 0.33         |
| cg14117934         | -0.05       | 0.75        | 0.67        | 0.03 | -0.33           | 0.09         |
| cg15218327         | -0.11       | 0.52        | 0.10        | 0.79 | -0.28           | 0.15         |
| cg15836722         | 0.00        | 0.98        | 0.11        | 0.77 | 0.12            | 0.55         |
| cg18635064         | -0.10       | 0.55        | 0.16        | 0.66 | -0.10           | 0.63         |
| cg18773937         | -0.13       | 0.46        | 0.06        | 0.87 | -0.11           | 0.59         |
| cg19890119         | 0.10        | 0.56        | -0.01       | 0.98 | 0.24            | 0.23         |
| cg20157753         | -0.09       | 0.59        | -0.55       | 0.10 | 0.22            | 0.27         |
| cg20983042         | -0.07       | 0.69        | 0.68        | 0.03 | -0.32           | 0.10         |
| cg23149881         | -0.12       | 0.46        | -0.25       | 0.50 | -0.01           | 0.95         |
| <b><i>IL6</i></b>  |             |             |             |      |                 |              |
| cg00087425         | 0.34        | <u>0.04</u> | 0.02        | 0.95 | 0.56            | <u>0.003</u> |
| cg00175482         | -0.22       | 0.19        | 0.03        | 0.94 | -0.32           | 0.11         |
| cg01770232         | 0.26        | 0.12        | 0.36        | 0.30 | 0.22            | 0.28         |
| cg02335517         | 0.06        | 0.71        | 0.59        | 0.07 | -0.08           | 0.70         |
| cg03601896         | 0.28        | 0.09        | 0.21        | 0.55 | 0.40            | 0.04         |
| cg05265849         | 0.09        | 0.59        | 0.11        | 0.75 | 0.12            | 0.54         |
| cg07998387         | -0.20       | 0.23        | -0.19       | 0.59 | -0.14           | 0.48         |
| cg10140158         | -0.07       | 0.70        | -0.23       | 0.52 | 0.08            | 0.70         |
| cg13104385         | 0.05        | 0.77        | 0.10        | 0.79 | 0.05            | 0.79         |
| cg15703690         | 0.14        | 0.39        | 0.18        | 0.61 | 0.28            | 0.16         |
| cg17067544         | -0.23       | 0.17        | -0.23       | 0.52 | -0.36           | 0.07         |
| cg20509117         | 0.15        | 0.38        | 0.29        | 0.41 | 0.06            | 0.75         |
| cg21785978         | 0.11        | 0.51        | 0.47        | 0.17 | 0.13            | 0.53         |
| cg23731304         | -0.25       | 0.13        | 0.15        | 0.68 | -0.32           | 0.10         |

Notes:  
underline nominal significance (P < 0.05)

Supplementary Table 9. Comparisons degree of DNAm change by neurosurgery between POD and non-POD in the *TNF* gene

| cg         | location       | EPIC |      |         |         |             | pyrosequencing |      |         |         |             |        |        |
|------------|----------------|------|------|---------|---------|-------------|----------------|------|---------|---------|-------------|--------|--------|
|            |                | POD  |      | non-POD |         | t-test      | adjusted       | POD  |         | non-POD |             | t-test | t-test |
|            |                | N=10 | N=27 | N=7     | N=20    |             |                |      |         |         |             |        |        |
| post-pre   | post-pre       |      |      | p-value | p-value | post-pre    | post-pre       | diff | p-value | p-value |             |        |        |
|            |                | mean | mean | diff    |         |             | mean           | mean |         |         |             |        |        |
|            | chr6: 31542460 |      |      |         |         |             | 5.4            | 3.6  | 1.8     | 0.45    | 0.87        |        |        |
| cg08639424 | chr6: 31542556 | 10.3 | 7.5  | 2.8     | 0.18    | 0.57        |                |      |         |         |             |        |        |
| cg19978379 | chr6: 31542671 | 8.9  | 9.3  | -0.4    | 0.86    | 0.17        |                |      |         |         |             |        |        |
| cg24452282 | chr6: 31542741 | 13.1 | 10.3 | 2.8     | 0.31    | 0.86        |                |      |         |         |             |        |        |
|            | chr6: 31543170 |      |      |         |         |             | -0.1           | -1.8 | 1.7     | 0.19    | 0.40        |        |        |
|            | chr6: 31543176 |      |      |         |         |             | -0.5           | -1.6 | 1.1     | 0.43    | 0.81        |        |        |
|            | chr6: 31543178 |      |      |         |         |             | 0.3            | -1.1 | 1.3     | 0.23    | 0.72        |        |        |
|            | chr6: 31543193 |      |      |         |         |             | -1.1           | -1.3 | 0.2     | 0.83    | 0.80        |        |        |
| cg21370522 | chr6: 31543219 | 0.8  | 1.0  | -0.2    | 0.94    | 0.58        | -0.2           | -0.9 | 0.7     | 0.29    | 0.72        |        |        |
| cg19648923 | chr6: 31543266 | -2.5 | -2.4 | -0.1    | 0.96    | 0.69        | -0.3           | -0.8 | 0.5     | 0.42    | 0.73        |        |        |
| cg01569083 | chr6: 31543290 | -2.2 | -1.2 | -1.1    | 0.63    | 0.48        | -0.4           | -0.8 | 0.4     | 0.56    | 0.97        |        |        |
| cg03037030 | chr6: 31543300 | -1.1 | -1.6 | 0.5     | 0.66    | 0.90        | -0.9           | -1.3 | 0.4     | 0.74    | 0.80        |        |        |
|            | chr6: 31543430 |      |      |         |         |             | 0.4            | -0.1 | 0.6     | 0.26    | 0.38        |        |        |
|            | chr6: 31543487 |      |      |         |         |             | -0.4           | -1.2 | 0.8     | 0.48    | 0.52        |        |        |
| cg12681001 | chr6: 31543541 | -2.0 | -1.7 | -0.4    | 0.78    | 0.51        | 0.4            | -1.9 | 2.3     | 0.11    | 0.29        |        |        |
| cg21222743 | chr6: 31543546 | -2.4 | -2.7 | 0.2     | 0.83    | 0.47        | -0.6           | -1.8 | 1.2     | 0.36    | 0.56        |        |        |
| cg10717214 | chr6: 31543558 | -2.2 | -3.1 | 0.9     | 0.47    | 0.07        | 1.1            | -1.5 | 2.6     | 0.38    | 0.32        |        |        |
| cg04425624 | chr6: 31543566 | -5.2 | -3.9 | -1.3    | 0.61    | 0.51        | 1.6            | -0.8 | 2.3     | 0.46    | 0.55        |        |        |
| cg21467614 | chr6: 31543638 | -3.0 | -2.9 | -0.1    | 0.94    | 0.50        |                |      |         |         |             |        |        |
| cg08553327 | chr6: 31543647 | -3.8 | -3.2 | -0.5    | 0.81    | 0.85        |                |      |         |         |             |        |        |
| cg26729380 | chr6: 31543655 | -4.2 | -3.5 | -0.7    | 0.69    | 0.69        |                |      |         |         |             |        |        |
| cg10650821 | chr6: 31543686 | -1.4 | -1.5 | 0.1     | 0.97    | 0.64        |                |      |         |         |             |        |        |
|            | chr6: 31544695 |      |      |         |         |             | 6.2            | 7.4  | -1.2    | 0.84    | 0.73        |        |        |
|            | chr6: 31544752 |      |      |         |         |             | 8.0            | 9.0  | -1.1    | 0.81    | 0.53        |        |        |
|            | chr6: 31544800 |      |      |         |         |             | 2.3            | 1.5  | 0.8     | 0.59    | 0.78        |        |        |
|            | chr6: 31544822 |      |      |         |         |             | 4.4            | 6.1  | -1.7    | 0.61    | 0.28        |        |        |
|            | chr6: 31544848 |      |      |         |         |             | -0.6           | 0.2  | -0.7    | 0.29    | 0.04        |        |        |
| cg01360627 | chr6: 31544931 | 10.3 | 8.0  | 2.3     | 0.36    | 0.58        | 1.5            | 1.4  | 0.1     | 0.93    | 0.47        |        |        |
| cg23384708 | chr6: 31544934 | 6.7  | 8.6  | -2.0    | 0.43    | <u>0.01</u> | 6.6            | 9.2  | -2.6    | 0.56    | 0.22        |        |        |
| cg20477259 | chr6: 31544960 | 10.9 | 10.0 | 0.9     | 0.73    | 0.27        | 7.5            | 6.6  | 0.9     | 0.82    | 0.89        |        |        |
|            | chr6: 31545253 |      |      |         |         |             | 4.4            | 3.6  | 0.8     | 0.77    | 0.89        |        |        |
|            | chr6: 31545258 |      |      |         |         |             | 3.5            | 3.9  | -0.4    | 0.89    | 0.72        |        |        |
|            | chr6: 31545267 |      |      |         |         |             | 3.7            | 6.5  | -2.8    | 0.41    | 0.16        |        |        |
| cg15989608 | chr6: 31545322 | 8.7  | 8.2  | 0.4     | 0.86    | 0.10        | -0.7           | 4.4  | -5.1    | 0.06    | <u>0.02</u> |        |        |
| cg26736341 | chr6: 31545343 | 9.3  | 9.4  | -0.1    | 0.95    | 0.09        | 4.6            | 2.1  | 2.6     | 0.40    | 0.31        |        |        |
|            | chr6: 31545432 |      |      |         |         |             | 1.5            | 3.2  | -1.7    | 0.71    | 0.65        |        |        |
| cg04472685 | chr6: 31545474 | 6.0  | 6.2  | -0.2    | 0.90    | 0.12        | 3.1            | 3.0  | 0.2     | 0.94    | 0.87        |        |        |
| cg19124225 | chr6: 31545836 | 1.7  | 0.2  | 1.5     | 0.11    | 0.52        |                |      |         |         |             |        |        |
| cg02137984 | chr6: 31545899 | 3.1  | 1.4  | 1.7     | 0.09    | 0.92        |                |      |         |         |             |        |        |
| cg06825478 | chr6: 31546068 | 3.6  | 4.2  | -0.6    | 0.77    | 0.17        | 2.6            | 2.4  | 0.2     | 0.84    | 0.96        |        |        |
|            | chr6: 31546086 |      |      |         |         |             | 4.3            | 4.2  | 0.1     | 0.97    | 0.81        |        |        |

Notes:

underline nominal significance (P < 0.05)

adjusted p-value (EPIC analysis); multiple regression analysis results corrected by age, sex, and cell proportion.

adjusted p-value (pyrosequencing); multiple regression analysis results corrected by age and sex.

**Supplementary Table 10. Comparisons of degree of DNAm change by neurosurgery between POD and non-POD in the IL1B and IL6 gene**

| cg                                                                                                                                                        | POD                      | non-POD                  | diff | t-test<br>p-value | adjusted<br>p-value |
|-----------------------------------------------------------------------------------------------------------------------------------------------------------|--------------------------|--------------------------|------|-------------------|---------------------|
|                                                                                                                                                           | N=10<br>post-pre<br>mean | N=27<br>post-pre<br>mean |      |                   |                     |
| <b>IL1B</b>                                                                                                                                               |                          |                          |      |                   |                     |
| cg01290568                                                                                                                                                | -13.4                    | -9.1                     | -4.3 | 0.23              | 0.90                |
| cg02596281                                                                                                                                                | -2.6                     | -1.3                     | -1.2 | 0.41              | 0.90                |
| cg07250315                                                                                                                                                | -6.9                     | -3.6                     | -3.3 | 0.11              | 0.59                |
| cg07935264                                                                                                                                                | -3.2                     | -2.4                     | -0.9 | 0.52              | 0.36                |
| cg10486274                                                                                                                                                | -0.7                     | -0.5                     | -0.2 | 0.77              | 0.63                |
| cg14117934                                                                                                                                                | -0.9                     | -0.7                     | -0.2 | 0.91              | 0.64                |
| cg15218327                                                                                                                                                | -2.8                     | -3.7                     | 1.0  | 0.45              | 0.66                |
| cg15836722                                                                                                                                                | -10.1                    | -4.7                     | -5.4 | <u>0.046</u>      | <u>0.04</u>         |
| cg18635064                                                                                                                                                | -0.8                     | -0.1                     | -0.7 | 0.36              | 0.63                |
| cg18773937                                                                                                                                                | -2.5                     | -2.3                     | -0.3 | 0.82              | 0.25                |
| cg19890119                                                                                                                                                | -9.2                     | -5.9                     | -3.4 | 0.19              | 0.96                |
| cg20157753                                                                                                                                                | -1.7                     | -0.2                     | -1.5 | <u>0.03</u>       | 0.25                |
| cg20983042                                                                                                                                                | -0.6                     | 0.2                      | -0.8 | 0.60              | 0.98                |
| cg23149881                                                                                                                                                | -7.4                     | -6.0                     | -1.4 | 0.57              | 0.27                |
| <b>IL6</b>                                                                                                                                                |                          |                          |      |                   |                     |
| cg00087425                                                                                                                                                | -0.1                     | 0.3                      | -0.4 | 0.64              | 0.28                |
| cg00175482                                                                                                                                                | -2.9                     | -1.9                     | -1.0 | 0.50              | 0.66                |
| cg01770232                                                                                                                                                | 0.1                      | 0.6                      | -0.6 | 0.37              | 0.67                |
| cg02335517                                                                                                                                                | -0.3                     | -0.9                     | 0.6  | 0.35              | 0.29                |
| cg03601896                                                                                                                                                | -1.3                     | -0.6                     | -0.8 | 0.28              | 0.76                |
| cg05265849                                                                                                                                                | -4.5                     | -1.8                     | -2.7 | <u>0.04</u>       | 0.28                |
| cg07998387                                                                                                                                                | -1.3                     | 1.4                      | -2.7 | <u>0.04</u>       | 0.31                |
| cg10140158                                                                                                                                                | 0.2                      | 0.2                      | 0.0  | >0.99             | 0.93                |
| cg13104385                                                                                                                                                | -2.6                     | -0.1                     | -2.5 | <u>0.04</u>       | 0.13                |
| cg15703690                                                                                                                                                | -5.4                     | -3.2                     | -2.2 | 0.15              | 0.85                |
| cg17067544                                                                                                                                                | 5.7                      | 4.2                      | 1.5  | 0.39              | 0.75                |
| cg20509117                                                                                                                                                | 0.2                      | -0.7                     | 0.9  | 0.70              | 0.40                |
| cg21785978                                                                                                                                                | -0.8                     | -0.1                     | -0.6 | 0.45              | 0.18                |
| cg23731304                                                                                                                                                | -5.2                     | -2.3                     | -3.0 | 0.08              | 0.23                |
| Notes:<br>underline nominal significance (P < 0.05)<br>adjusted p-value; multiple regression analysis results corrected by age, sex, and cell proportion. |                          |                          |      |                   |                     |

## Supplementary Figures

Supplementary Figure 1 is shown in “Supplementary method” section.

### Supplementary Figure 2

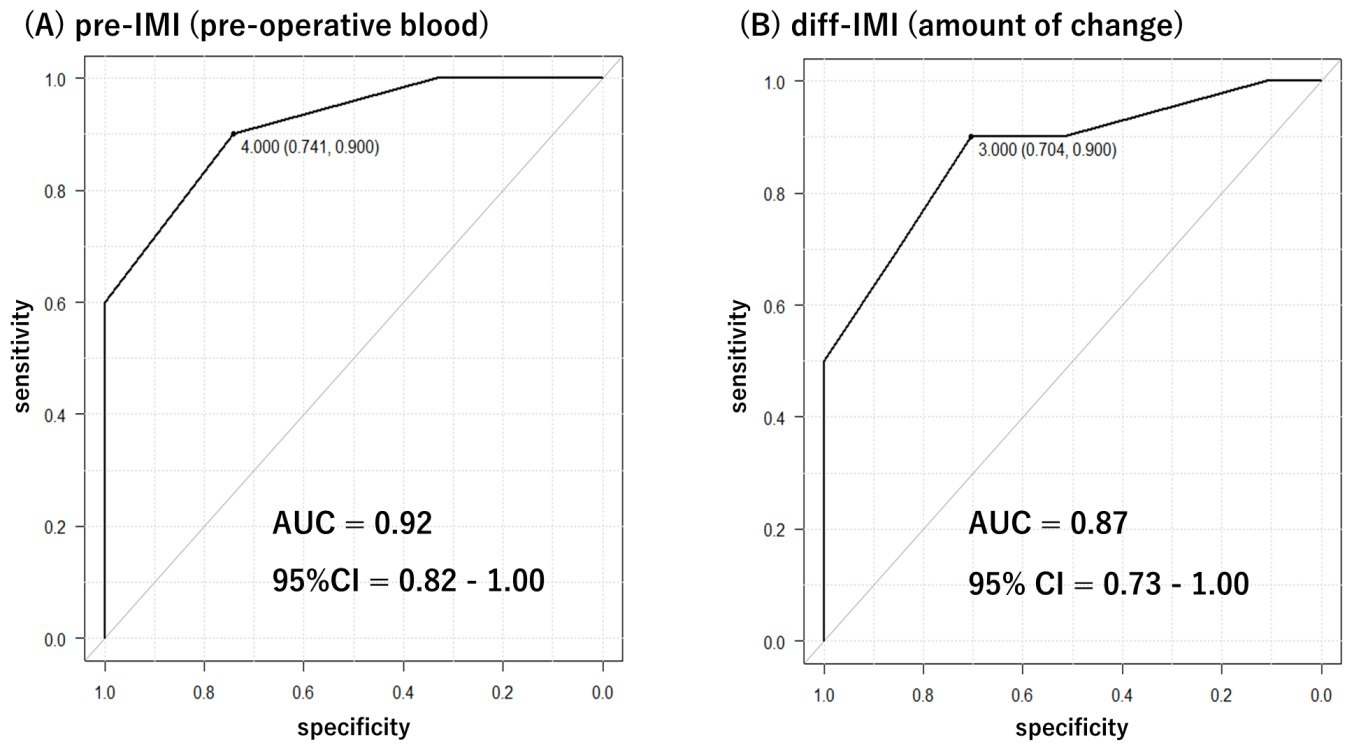

### Supplementary Figure 2

(A) ROC curve based on pre-IMI from pre-operative blood

(B) ROC curve based on diff-IMI from amount of change of DNAm

## Supplementary Figure 3

(A) IMI (post-operative blood)

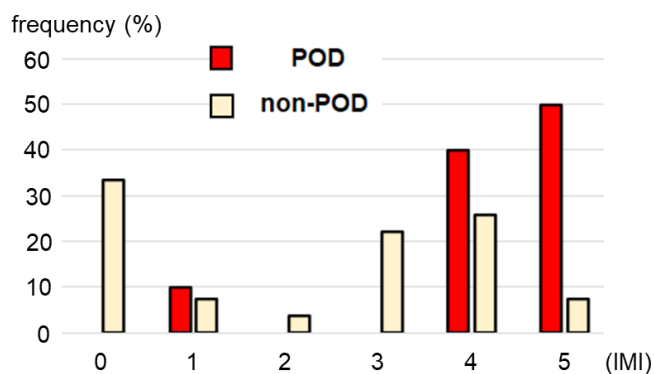

(B) IMI (the validation dataset)

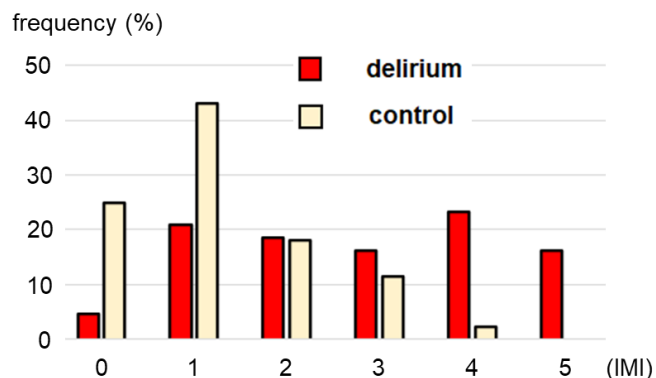

(C) pre-IMI (pre-operative blood)

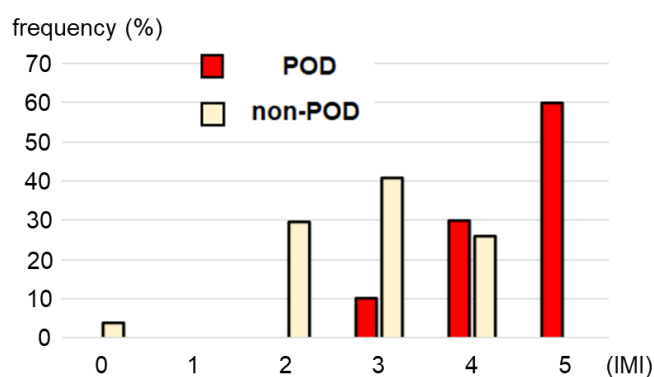

(D) Distribution of diff-IMI (amount of change)

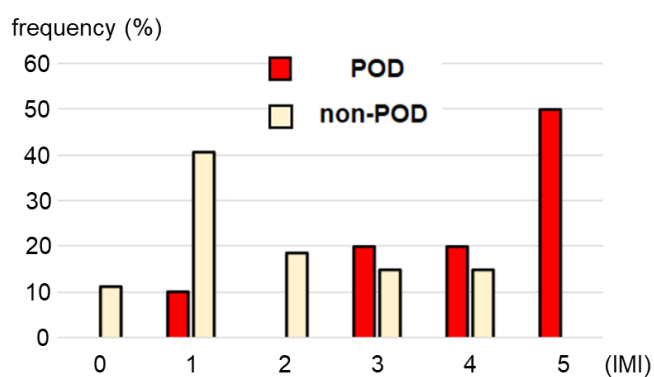

## Supplementary Figure 3

- (A) Distribution of IMI (post-operative blood)
- (B) Distribution of IMI (the validation dataset)
- (C) Distribution of pre-IMI (pre-operative blood)
- (D) Distribution of diff-IMI (amount of change)
